# Supplementary material
Source: PubMed Central journal article supplement (PMC1851074)
Supplement: pnas_0607061104_4.pdf [file pnas_0607061104_4.pdf]

### **Word pair event**

- 1) Positive social function (N=75)
- 2) Negative social function (N=75)
- 3) Animal function (N=75)

Button press  
↓

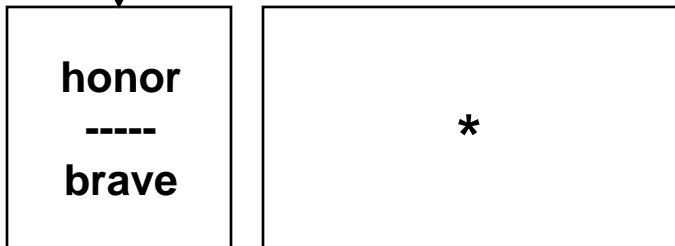

2500

mean length = 4600 [ms]

### **Fixation event**

(N=72)

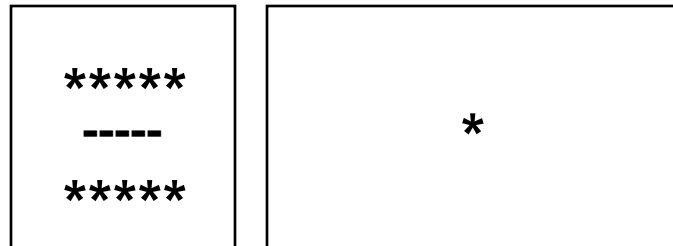

2500

mean length = 4600 [ms]
